# Supplementary material
Source: publisher site journal article supplement (https://www.spandidos-publications.com/939/downloadSupplementary)
Supplement: Supplementary file 1 [file downloadSupplementary]

## Sheet: Sheet1
Table SI. Expression of CDCA2 in different stages of ccRCC.
Sample	CDCA2	Sample_type	Neoplasm_histologic_grade	Pathologic_M	Pathologic_N	Pathologic_stage	Pathologic_T
TCGA-CZ-4860-01	11.55	Tumor	G4	M1		Stage IV	T4
TCGA-B8-4146-01	11.22	Tumor	G2	M0		Stage I	T1
TCGA-BP-4342-01	11.07	Tumor	G3	M0	N0	Stage II	T2
TCGA-CZ-4858-01	10.95	Tumor	G4	M0		Stage II	T2
TCGA-CJ-4635-01	10.81	Tumor	G3	M0		Stage I	T1
TCGA-B0-4844-01	10.76	Tumor	G3	M1		Stage IV	T3
TCGA-A3-3335-01	10.68	Tumor	G4	M0	N0	Stage II	T2
TCGA-A3-3316-01	10.66	Tumor	G3	M0		Stage II	T2
TCGA-CZ-4853-01	10.65	Tumor	G2	M0		Stage I	T1
TCGA-B8-4154-01	10.63	Tumor	G2	M0	N0	Stage I	T1
TCGA-B0-5116-01	10.54	Tumor	G3	M0	N0	Stage III	T3
TCGA-B0-4713-01	10.52	Tumor	G2	M0		Stage III	T3
TCGA-A3-3352-01	10.48	Tumor	G3	M0	N0	Stage III	T3
TCGA-BP-5180-01	10.38	Tumor	G2	M0		Stage I	T1
TCGA-B0-4837-01	10.33	Tumor	G3	M0	N0	Stage I	T1
TCGA-CZ-4857-01	10.3	Tumor	G3	M1	N0	Stage IV	T3
TCGA-A3-3385-01	10.3	Tumor	G2	M0	N0	Stage I	T1
TCGA-BP-5187-01	10.27	Tumor	G2	M0		Stage I	T1
TCGA-EU-5907-01	10.26	Tumor	G3	M0		Stage III	T3
TCGA-BP-4983-01	10.25	Tumor	G4	M0		Stage III	T3
TCGA-CJ-6032-01	10.25	Tumor	G3	M0		Stage II	T2
TCGA-BP-4343-01	10.24	Tumor	G3	M0	N0	Stage III	T3
TCGA-BP-5191-01	10.22	Tumor	G2	M0	N0	Stage III	T3
TCGA-G6-A8L7-01	10.18	Tumor	G3		N0	Stage I	T1
TCGA-CJ-4639-01	10.17	Tumor	G2	M0	N0	Stage II	T2
TCGA-B4-5832-01	10.15	Tumor	G2	M0	N0	Stage III	T3
TCGA-CJ-4871-01	10.1	Tumor	G4	M1		Stage IV	T3
TCGA-CZ-4859-01	10.1	Tumor	G2	M0	N0	Stage I	T1
TCGA-A3-3357-01	10.09	Tumor	G3	M0	N0	Stage II	T2
TCGA-B0-4817-01	10.08	Tumor	G3	M0	N0	Stage III	T3
TCGA-B0-5700-01	10.04	Tumor	G2	M0	N0	Stage I	T1
TCGA-BP-4803-01	10.03	Tumor	G3	M0		Stage III	T3
TCGA-CJ-4874-01	9.993	Tumor	G3	M0	N0	Stage I	T1
TCGA-CZ-5984-01	9.969	Tumor	G3	M0	N0	Stage I	T1
TCGA-BP-5168-01	9.967	Tumor	G2	M0		Stage I	T1
TCGA-CZ-5464-01	9.965	Tumor	G2	M1		Stage IV	T3
TCGA-B0-4827-01	9.963	Tumor	G4	M0	N0	Stage III	T3
TCGA-CZ-5454-01	9.939	Tumor	G2	M1	N0	Stage IV	T2
TCGA-B0-5099-01	9.933	Tumor	G3	M0		Stage III	T3
TCGA-B0-5701-01	9.909	Tumor	G4	M0	N0	Stage III	T3
TCGA-CZ-5459-01	9.906	Tumor	G3	M0		Stage III	T3
TCGA-BP-4975-01	9.906	Tumor	G3	M0		Stage I	T1
TCGA-CW-6090-01	9.904	Tumor	G3	M0		Stage I	T1
TCGA-B4-5838-01	9.901	Tumor	G2	M0	N1	Stage IV	T3
TCGA-CJ-5679-01	9.9	Tumor	G4	M0		Stage III	T3
TCGA-B0-4836-01	9.888	Tumor	G3	M1		Stage IV	T3
TCGA-BP-4797-01	9.883	Tumor	G3	M0	N0	Stage III	T3
TCGA-BP-4775-01	9.849	Tumor	G2	M0		Stage I	T1
TCGA-BP-4325-01	9.839	Tumor	G2	M0	N0	Stage I	T1
TCGA-B0-5694-01	9.832	Tumor	G3	M0	N0	Stage III	T3
TCGA-AK-3458-01	9.83	Tumor	G3	M0		Stage I	T1
TCGA-BP-4976-01	9.828	Tumor	G3	M0		Stage I	T1
TCGA-B0-4852-01	9.818	Tumor	G2	M0	N0	Stage II	T2
TCGA-CZ-5986-01	9.816	Tumor	G3	M0	N0	Stage I	T1
TCGA-BP-5181-01	9.816	Tumor	G2	M0		Stage I	T1
TCGA-A3-3323-01	9.814	Tumor	G1	M0		Stage I	T1
TCGA-B0-4690-01	9.814	Tumor	G3	M1	N0	Stage IV	T4
TCGA-CZ-5451-01	9.802	Tumor	G3	M0	N0	Stage II	T2
TCGA-BP-4158-01	9.801	Tumor	G2	M0	N0	Stage I	T1
TCGA-CZ-5988-01	9.798	Tumor	G2	M0	N0	Stage I	T1
TCGA-BP-4964-01	9.787	Tumor	G2	M0	N0	Stage I	T1
TCGA-BP-4329-01	9.786	Tumor	G2	M0	N0	Stage III	T3
TCGA-B0-5699-01	9.784	Tumor	G2	M0	N0	Stage I	T1
TCGA-A3-3370-01	9.776	Tumor	G2	M0	N0	Stage I	T1
TCGA-B2-3924-01	9.764	Tumor	G2	M0		Stage I	T1
TCGA-A3-3346-01	9.763	Tumor	G3	M0		Stage I	T1
TCGA-A3-3331-01	9.755	Tumor	G2	M0	N0	Stage I	T1
TCGA-BP-4765-01	9.746	Tumor	G2	M0		Stage I	T1
TCGA-B0-4710-01	9.734	Tumor	G3	M0	N0	Stage III	T3
TCGA-B0-5711-01	9.733	Tumor	G3	M0		Stage III	T3
TCGA-A3-3322-01	9.723	Tumor	G2	M0		Stage I	T1
TCGA-A3-A8OV-01	9.719	Tumor	G2			Stage I	T1
TCGA-BP-5190-01	9.714	Tumor	G3	M0		Stage I	T1
TCGA-BP-5194-01	9.71	Tumor	G2	M0		Stage I	T1
TCGA-BP-4166-01	9.702	Tumor	G3	M0	N0	Stage III	T3
TCGA-CJ-4872-01	9.696	Tumor	G4	M0	N0	Stage I	T1
TCGA-CW-5591-11	9.694	Normal	G2	M1	N0	Stage IV	T3
TCGA-B4-5844-01	9.686	Tumor	G1	M0	N0	Stage II	T2
TCGA-B8-4153-01	9.674	Tumor	G3	M0		Stage III	T3
TCGA-CW-5580-01	9.672	Tumor	G3	M1		Stage IV	T3
TCGA-AK-3428-01	9.671	Tumor	G2	M0	N0	Stage III	T3
TCGA-BP-4774-01	9.666	Tumor	G2	M0		Stage I	T1
TCGA-B0-5115-01	9.647	Tumor	G3	M1	N0	Stage IV	T2
TCGA-B0-4846-01	9.641	Tumor	G2	M1	N0	Stage IV	T3
TCGA-B0-5399-01	9.639	Tumor	G2	M0	N0	Stage I	T1
TCGA-DV-5568-01	9.629	Tumor	G2	M0		Stage I	T1
TCGA-CJ-4895-01	9.623	Tumor	G4	M1		Stage IV	T3
TCGA-CW-5589-01	9.617	Tumor	G2	M0		Stage I	T1
TCGA-CJ-4901-01	9.616	Tumor	G3	M0		Stage III	T3
TCGA-CZ-5465-01	9.616	Tumor	G2	M0		Stage III	T3
TCGA-CJ-6028-01	9.615	Tumor	G4	M1		Stage IV	T3
TCGA-BP-4977-01	9.609	Tumor	G3	M0		Stage I	T1
TCGA-BP-4763-01	9.609	Tumor	G2	M0		Stage I	T1
TCGA-A3-3320-01	9.608	Tumor	G1	M0		Stage I	T1
TCGA-CZ-5456-01	9.598	Tumor	G3	M0	N0	Stage II	T2
TCGA-A3-3326-01	9.595	Tumor	G1	M0		Stage I	T1
TCGA-B8-5549-01	9.59	Tumor	G3	M0	N0	Stage I	T1
TCGA-CW-5581-01	9.579	Tumor	G3	M0		Stage I	T1
TCGA-CJ-4887-01	9.577	Tumor	G3	M1		Stage IV	T3
TCGA-BP-4982-01	9.576	Tumor	G3	M0		Stage I	T1
TCGA-BP-4351-01	9.57	Tumor	G2	M0	N0	Stage III	T3
TCGA-B0-4694-01	9.569	Tumor	G4	M0		Stage III	T3
TCGA-AK-3451-01	9.568	Tumor	G3	M0	N0	Stage II	T2
TCGA-BP-4973-01	9.566	Tumor	G3	M0		Stage III	T3
TCGA-BP-4353-01	9.566	Tumor	G2	M0	N0	Stage I	T1
TCGA-BP-4963-01	9.563	Tumor	G3	M0		Stage I	T1
TCGA-EU-5906-01	9.558	Tumor	G2	M0		Stage I	T1
TCGA-B0-5077-01	9.557	Tumor	G3	M0	N0	Stage I	T1
TCGA-CJ-4907-01	9.556	Tumor	G3	M0		Stage III	T3
TCGA-A3-3343-01	9.555	Tumor	G3	M0	N0	Stage II	T2
TCGA-CZ-5987-01	9.537	Tumor	G2	M1		Stage IV	T3
TCGA-B8-4620-01	9.535	Tumor	G2	M0	N0	Stage III	T3
TCGA-A3-3367-01	9.524	Tumor	G3	M0	N0	Stage I	T1
TCGA-CZ-5989-01	9.517	Tumor	G2	M0	N0	Stage II	T2
TCGA-B0-5705-01	9.515	Tumor	G2	M0	N0	Stage I	T1
TCGA-CJ-5684-01	9.508	Tumor	G2	M0		Stage III	T3
TCGA-B0-5085-01	9.506	Tumor	G3	M0	N0	Stage III	T3
TCGA-B0-4822-01	9.493	Tumor	G4	M0		Stage II	T2
TCGA-BP-4759-01	9.493	Tumor	G2	M0		Stage I	T1
TCGA-BP-4789-01	9.493	Tumor	G2	M0		Stage I	T1
TCGA-BP-5185-01	9.485	Tumor	G3	M0		Stage I	T1
TCGA-AK-3454-01	9.484	Tumor	G3	M0		Stage I	T1
TCGA-BP-4962-01	9.48	Tumor	G2	M0		Stage II	T2
TCGA-CW-5585-01	9.476	Tumor	G2	M1	N0	Stage IV	T3
TCGA-A3-3306-01	9.474	Tumor	G3	M0	N0	Stage I	T1
TCGA-CJ-4904-01	9.469	Tumor	G3	M1	N0	Stage IV	T3
TCGA-CW-5588-01	9.469	Tumor	G2	M0		Stage I	T1
TCGA-CZ-5457-01	9.463	Tumor	G4	M0		Stage III	T3
TCGA-BP-4960-01	9.462	Tumor	G3	M0	N0	Stage II	T2
TCGA-BP-5184-01	9.461	Tumor	G3	M0		Stage I	T1
TCGA-BP-4768-01	9.451	Tumor	G2	M0	N0	Stage I	T1
TCGA-B0-5706-01	9.445	Tumor	G2	M0	N0	Stage II	T2
TCGA-A3-3324-01	9.444	Tumor	G3	M0		Stage I	T1
TCGA-BP-4790-01	9.439	Tumor	G2	M0		Stage I	T1
TCGA-BP-4777-01	9.432	Tumor	G3	M0		Stage I	T1
TCGA-CJ-5678-01	9.427	Tumor	G3	M1	N0	Stage IV	T2
TCGA-CW-5587-01	9.427	Tumor	G2	M0	N0	Stage III	T3
TCGA-BP-5006-01	9.422	Tumor	G2	M0	N0	Stage I	T1
TCGA-AK-3460-01	9.42	Tumor	G2	M0		Stage I	T1
TCGA-BP-5169-01	9.419	Tumor	G4	M0	N0	Stage I	T1
TCGA-BP-4968-01	9.414	Tumor	G3	M0	N0	Stage I	T1
TCGA-CZ-5985-01	9.409	Tumor	G2	M0	N0	Stage II	T2
TCGA-BP-5192-01	9.407	Tumor	G2	M0		Stage I	T1
TCGA-AS-3778-01	9.406	Tumor	G1	M0		Stage I	T1
TCGA-BP-4766-01	9.404	Tumor	G3	M0		Stage I	T1
TCGA-BP-4330-01	9.404	Tumor	G2	M0	N0	Stage III	T3
TCGA-B0-4701-01	9.403	Tumor	G3	M1	N0	Stage IV	T3
TCGA-CW-5583-01	9.402	Tumor	G2	M0		Stage I	T1
TCGA-BP-4801-01	9.4	Tumor	G2	M0		Stage I	T1
TCGA-CZ-5982-01	9.394	Tumor	G2	M0		Stage I	T1
TCGA-B0-5075-01	9.392	Tumor	G2	M0	N0	Stage III	T3
TCGA-B0-5402-01	9.38	Tumor	G4	M0		Stage IV	T4
TCGA-BP-4999-01	9.375	Tumor	G2	M0		Stage I	T1
TCGA-BP-4987-01	9.372	Tumor	G2	M0		Stage I	T1
TCGA-GK-A6C7-01	9.362	Tumor				Stage I	T1
TCGA-BP-4991-01	9.348	Tumor	G2	M0		Stage I	T1
TCGA-B0-4811-01	9.346	Tumor	G3	M0	N0	Stage III	T3
TCGA-B0-4824-01	9.332	Tumor	G3	M0	N0	Stage I	T1
TCGA-A3-A6NJ-01	9.328	Tumor	G1			Stage I	T1
TCGA-B0-5812-01	9.324	Tumor	G3	M0		Stage I	T1
TCGA-B0-5119-01	9.322	Tumor	G2	M0	N0	Stage I	T1
TCGA-B0-5400-01	9.315	Tumor	G4	M0	N0	Stage III	T3
TCGA-B8-4622-01	9.308	Tumor	G3	M1	N0	Stage IV	T3
TCGA-MW-A4EC-01	9.305	Tumor	G2			Stage I	T1
TCGA-BP-4969-01	9.304	Tumor	G2	M0		Stage I	T1
TCGA-B0-4814-01	9.288	Tumor	G3	M1	N0	Stage IV	T4
TCGA-B0-5097-01	9.281	Tumor	G2	M0	N0	Stage III	T3
TCGA-CZ-4856-01	9.279	Tumor	G2	M0	N0	Stage I	T1
TCGA-DV-5569-01	9.276	Tumor	G2	M0		Stage I	T1
TCGA-CJ-6027-01	9.265	Tumor	G4	M0		Stage I	T1
TCGA-CJ-4638-01	9.263	Tumor	G4	M1	N1	Stage IV	T3
TCGA-CJ-4892-01	9.263	Tumor	G2	M0	N0	Stage I	T1
TCGA-EU-5904-01	9.256	Tumor	G1	M0		Stage I	T1
TCGA-BP-4160-01	9.248	Tumor	G2	M0	N0	Stage III	T3
TCGA-B0-5703-01	9.241	Tumor	G3	M0	N0	Stage I	T1
TCGA-B8-5550-01	9.228	Tumor	G3	M0	N0	Stage III	T3
TCGA-B0-4823-01	9.227	Tumor	G2	M0	N0	Stage I	T1
TCGA-B0-5693-01	9.224	Tumor	G2	M0		Stage I	T1
TCGA-A3-3373-01	9.218	Tumor	G3	M0	N0	Stage I	T1
TCGA-CJ-4897-01	9.214	Tumor	G3	M0		Stage III	T3
TCGA-BP-4161-01	9.212	Tumor	G3	M0		Stage I	T1
TCGA-B0-4691-01	9.202	Tumor	G3	M1	N0	Stage IV	T2
TCGA-B0-4700-01	9.193	Tumor	G4	M1		Stage IV	T4
TCGA-A3-3380-01	9.187	Tumor	G2	M0	N0	Stage I	T1
TCGA-BP-4972-01	9.178	Tumor	G3	M0		Stage III	T3
TCGA-B8-4143-01	9.17	Tumor	G3	M1	N0	Stage IV	T3
TCGA-B8-A7U6-01	9.168	Tumor	G3			Stage I	T1
TCGA-CJ-4882-01	9.164	Tumor	G3	M0		Stage III	T3
TCGA-CZ-5463-01	9.156	Tumor	G2	M0		Stage II	T2
TCGA-BP-5183-01	9.152	Tumor	G3	M0		Stage III	T3
TCGA-B0-4828-01	9.15	Tumor	G3	M1		Stage IV	T2
TCGA-B4-5843-01	9.149	Tumor	G2	M0	N0	Stage I	T1
TCGA-B0-5095-01	9.139	Tumor	G3	M0	N0	Stage III	T3
TCGA-A3-3347-01	9.137	Tumor	G2	M0	N1	Stage III	T1
TCGA-BP-4988-01	9.13	Tumor	G2	M0	N0	Stage I	T1
TCGA-BP-5004-01	9.124	Tumor	G3	M0		Stage I	T1
TCGA-CZ-4854-01	9.119	Tumor	G2	M0	N0	Stage I	T1
TCGA-A3-A6NL-01	9.118	Tumor	G2			Stage I	T1
TCGA-B0-4698-01	9.114	Tumor	G4	M0		Stage IV	T4
TCGA-A3-3359-01	9.106	Tumor	G2	M0	N0	Stage I	T1
TCGA-B0-4810-01	9.104	Tumor	G3	M0	N1	Stage III	T3
TCGA-CJ-4886-01	9.104	Tumor	G3	M0		Stage I	T1
TCGA-B8-5158-01	9.102	Tumor	G4	M0	N1	Stage III	T3
TCGA-CJ-5676-01	9.101	Tumor	G3	M0		Stage III	T3
TCGA-BP-5170-01	9.086	Tumor	G2	M0		Stage I	T1
TCGA-B8-A54G-01	9.085	Tumor	G3			Stage I	T1
TCGA-CJ-4634-01	9.083	Tumor	G2	M0		Stage I	T1
TCGA-B0-4818-01	9.076	Tumor	G3	M0		Stage II	T2
TCGA-CJ-4641-01	9.066	Tumor	G4	M1		Stage IV	T3
TCGA-BP-5198-01	9.064	Tumor	G3	M0	N0	Stage III	T3
TCGA-CJ-4868-01	9.059	Tumor	G3	M1	N0	Stage IV	T3
TCGA-BP-5174-01	9.055	Tumor	G2	M0		Stage I	T1
TCGA-BP-4162-01	9.051	Tumor	G2	M0	N0	Stage I	T1
TCGA-BP-4340-01	9.039	Tumor	G2	M0	N0	Stage I	T1
TCGA-A3-3307-01	9.037	Tumor	G3	M0	N0	Stage III	T3
TCGA-A3-3308-01	9.037	Tumor	G2	M0	N0	Stage III	T3
TCGA-BP-4967-01	9.035	Tumor	G2	M0	N0	Stage III	T3
TCGA-B8-A54H-01	9.031	Tumor	G3		N0	Stage II	T2
TCGA-CJ-4644-01	9.03	Tumor	G3	M1	N0	Stage IV	T3
TCGA-CJ-4916-01	9.015	Tumor	G3	M0		Stage III	T3
TCGA-A3-3351-01	9.013	Tumor	G2	M0	N0	Stage II	T2
TCGA-B4-5377-01	9.013	Tumor	G3	M1	N0	Stage IV	T3
TCGA-BP-5186-01	9.012	Tumor	G2	M0	N0	Stage I	T1
TCGA-B0-4843-01	9.011	Tumor	G3	M0	N0	Stage III	T3
TCGA-BP-4170-01	9.006	Tumor	G2	M0	N0	Stage I	T1
TCGA-B2-4101-01	9.002	Tumor	G3	M0		Stage II	T2
TCGA-B4-5836-01	9	Tumor	G2	M0	N0	Stage I	T1
TCGA-BP-5176-01	8.994	Tumor	G2	M0		Stage I	T1
TCGA-B0-5696-01	8.988	Tumor	G4	M0	N0	Stage III	T3
TCGA-BP-4159-01	8.988	Tumor	G2	M0	N0	Stage I	T1
TCGA-A3-3362-01	8.987	Tumor	G2	M0	N0	Stage I	T1
TCGA-AK-3455-01	8.981	Tumor	G3	M0		Stage III	T3
TCGA-CJ-4908-01	8.974	Tumor	G2	M0		Stage I	T1
TCGA-B0-5121-01	8.959	Tumor	G2	M0	N0	Stage I	T1
TCGA-BP-5173-01	8.957	Tumor	G2	M0		Stage I	T1
TCGA-B2-5641-01	8.949	Tumor	G3	M0	N0	Stage I	T1
TCGA-A3-3317-01	8.944	Tumor	G2	M0	N0	Stage II	T2
TCGA-B0-4821-01	8.929	Tumor	G3	M0	N0	Stage III	T3
TCGA-BP-4961-01	8.926	Tumor	G2	M0		Stage I	T1
TCGA-B0-5088-01	8.924	Tumor	G3	M0	N0	Stage I	T1
TCGA-CJ-5683-01	8.922	Tumor	G3	M0		Stage I	T1
TCGA-AK-3436-01	8.918	Tumor	G2	M1	N0	Stage IV	T2
TCGA-CJ-4903-01	8.911	Tumor	G3	M0		Stage I	T1
TCGA-CW-6093-01	8.896	Tumor	G1	M0		Stage I	T1
TCGA-CZ-4861-01	8.891	Tumor	G2	M0		Stage II	T2
TCGA-CJ-4869-01	8.889	Tumor	G2	M0	N1	Stage III	T2
TCGA-A3-3383-01	8.878	Tumor	G2	M0		Stage I	T1
TCGA-BP-4164-01	8.878	Tumor	G2	M0		Stage III	T3
TCGA-BP-5195-01	8.872	Tumor	G2	M0		Stage I	T1
TCGA-A3-3349-01	8.867	Tumor	G2	M0	N0	Stage I	T1
TCGA-A3-3358-01	8.865	Tumor	G2	M0	N0	Stage I	T1
TCGA-BP-5202-01	8.861	Tumor	G2	M0		Stage III	T3
TCGA-A3-A6NI-01	8.859	Tumor	G3			Stage I	T1
TCGA-CJ-4902-01	8.858	Tumor	G3	M0		Stage III	T3
TCGA-CW-6097-01	8.847	Tumor	G4	M0		Stage III	T3
TCGA-B4-5834-01	8.837	Tumor	G1	M0	N0	Stage I	T1
TCGA-BP-4807-01	8.836	Tumor	G3	M0		Stage I	T1
TCGA-A3-3319-01	8.83	Tumor	G2	M0		Stage I	T1
TCGA-B0-4848-01	8.829	Tumor	G3	M0		Stage III	T3
TCGA-B8-5165-01	8.829	Tumor	G2	M0	N0	Stage I	T1
TCGA-A3-A8OW-01	8.822	Tumor	G2			Stage III	T3
TCGA-B0-5104-01	8.822	Tumor	G2	M0	N0	Stage I	T1
TCGA-CJ-4920-01	8.817	Tumor	G2	M0		Stage I	T1
TCGA-BP-4781-01	8.811	Tumor	G3	M0		Stage I	T1
TCGA-BP-4762-01	8.806	Tumor	G3	M0		Stage I	T1
TCGA-B0-5691-01	8.803	Tumor	G3	M0	N0	Stage I	T1
TCGA-B2-4099-01	8.801	Tumor	G3	M0		Stage I	T1
TCGA-B8-A54F-01	8.796	Tumor	G2			Stage I	T1
TCGA-BP-5001-01	8.794	Tumor	G2	M0		Stage I	T1
TCGA-B0-5110-01	8.792	Tumor	G2	M0	N0	Stage I	T1
TCGA-DV-5566-01	8.79	Tumor	G2	M0		Stage I	T1
TCGA-CJ-6031-01	8.784	Tumor	G3	M0		Stage I	T1
TCGA-AK-3429-01	8.783	Tumor	G2	M0	N0	Stage II	T2
TCGA-B0-5709-01	8.776	Tumor	G3	M0		Stage III	T3
TCGA-B8-A54J-01	8.766	Tumor	G2			Stage II	T2
TCGA-B0-4718-01	8.764	Tumor	G2	M0		Stage III	T3
TCGA-CW-6088-01	8.762	Tumor	G2	M0	N0	Stage I	T1
TCGA-BP-4165-01	8.755	Tumor	G1	M0	N0	Stage I	T1
TCGA-B0-4847-01	8.754	Tumor	G3	M1		Stage IV	T3
TCGA-B0-4706-01	8.751	Tumor	G4	M0		Stage III	T3
TCGA-BP-4804-01	8.743	Tumor	G2	M0		Stage I	T1
TCGA-BP-5178-01	8.741	Tumor	G4	M1		Stage IV	T3
TCGA-CJ-4899-01	8.73	Tumor	G2	M0		Stage I	T1
TCGA-G6-A5PC-01	8.729	Tumor	G4	M1	N0	Stage IV	T1
TCGA-CJ-4893-01	8.722	Tumor	G3	M0		Stage I	T1
TCGA-A3-3387-01	8.708	Tumor	G2	M0	N0	Stage I	T1
TCGA-DV-A4VX-01	8.704	Tumor	G4		N0	Stage IV	T3
TCGA-AK-3450-01	8.697	Tumor	G2	M0	N0	Stage I	T1
TCGA-CW-5590-01	8.696	Tumor	G3	M1		Stage IV	T3
TCGA-BP-4974-01	8.692	Tumor	G4	M1	N0	Stage IV	T3
TCGA-A3-A8CQ-01	8.692	Tumor	G2			Stage I	T1
TCGA-3Z-A93Z-01	8.688	Tumor	G2	M0	N0	Stage I	T1
TCGA-B2-4102-01	8.665	Tumor	G2	M0		Stage I	T1
TCGA-CZ-5460-01	8.664	Tumor	G2	M1		Stage IV	T3
TCGA-AK-3444-01	8.662	Tumor	G2	M0		Stage I	T1
TCGA-CJ-5686-01	8.659	Tumor	G3	M0		Stage I	T1
TCGA-A3-3378-01	8.656	Tumor	G3	M0	N0	Stage I	T1
TCGA-CW-5584-01	8.654	Tumor	G3	M0	N1	Stage III	T3
TCGA-CZ-4866-01	8.653	Tumor	G3	M0		Stage I	T1
TCGA-CZ-5452-01	8.635	Tumor	G2	M0	N0	Stage II	T2
TCGA-BP-4332-01	8.625	Tumor	G2	M0	N0	Stage III	T3
TCGA-A3-3329-01	8.623	Tumor	G2	M0	N0	Stage I	T1
TCGA-CZ-5455-01	8.606	Tumor	G4	M1		Stage IV	T3
TCGA-BP-4335-01	8.604	Tumor	G3	M1	N0	Stage IV	T3
TCGA-A3-3365-01	8.603	Tumor	G2	M0		Stage I	T1
TCGA-CJ-4637-01	8.6	Tumor	G4	M1		Stage IV	T2
TCGA-CJ-4875-01	8.583	Tumor	G3	M1		Stage IV	T3
TCGA-CJ-5675-01	8.576	Tumor	G3	M0		Stage II	T2
TCGA-BP-4338-01	8.568	Tumor	G3	M0	N0	Stage I	T1
TCGA-CZ-5453-01	8.565	Tumor	G2	M0		Stage II	T2
TCGA-B8-4151-01	8.559	Tumor	G2	M0	N0	Stage III	T3
TCGA-B0-5690-01	8.54	Tumor	G1	M0		Stage I	T1
TCGA-B0-4693-01	8.539	Tumor	G4	M0	N0	Stage III	T3
TCGA-B0-5092-01	8.53	Tumor	G3	M1	N0	Stage IV	T1
TCGA-B0-5692-01	8.529	Tumor	G3	M0	N0	Stage III	T3
TCGA-BP-5007-01	8.525	Tumor	G2	M0	N0	Stage II	T2
TCGA-B0-4833-01	8.517	Tumor	G2	M0	N0	Stage I	T1
TCGA-BP-5175-01	8.513	Tumor	G3	M0		Stage I	T1
TCGA-B0-5695-01	8.512	Tumor	G2	M0	N0	Stage I	T1
TCGA-B0-5120-01	8.504	Tumor	G2	M0	N0	Stage I	T1
TCGA-BP-5201-01	8.5	Tumor	G4	M1	N0	Stage IV	T3
TCGA-CJ-5677-01	8.493	Tumor	G4	M1		Stage IV	T3
TCGA-CJ-5682-01	8.491	Tumor	G4	M1		Stage IV	T3
TCGA-BP-5189-01	8.465	Tumor	G4	M0		Stage I	T1
TCGA-BP-4167-01	8.464	Tumor	G2	M0		Stage III	T3
TCGA-BP-5177-01	8.458	Tumor	G3	M0		Stage I	T1
TCGA-BP-4346-01	8.443	Tumor	G3	M0	N0	Stage III	T3
TCGA-A3-A8OX-01	8.439	Tumor	G3			Stage I	T1
TCGA-BP-4331-01	8.434	Tumor	G2	M0	N0	Stage I	T1
TCGA-B2-5639-01	8.428	Tumor	G3	M1		Stage IV	T3
TCGA-BP-4174-01	8.427	Tumor	G3	M0	N0	Stage II	T2
TCGA-BP-4776-01	8.427	Tumor	G2	M0		Stage I	T1
TCGA-AK-3461-01	8.42	Tumor	G2	M0		Stage I	T1
TCGA-B0-5113-01	8.42	Tumor	G2	M0	N0	Stage III	T3
TCGA-A3-3311-01	8.419	Tumor	G2	M0		Stage I	T1
TCGA-B0-5094-01	8.417	Tumor	G2	M1	N0	Stage IV	T3
TCGA-BP-4965-01	8.406	Tumor	G2	M0		Stage I	T1
TCGA-B8-5163-01	8.398	Tumor	G3	M0	N0	Stage III	T3
TCGA-BP-4347-01	8.388	Tumor	G2	M0		Stage III	T3
TCGA-BP-5009-01	8.384	Tumor	G3	M0		Stage I	T1
TCGA-B8-5159-01	8.378	Tumor	G3	M0	N0	Stage I	T1
TCGA-DV-5575-01	8.359	Tumor	G2	M0		Stage I	T1
TCGA-BP-4327-01	8.359	Tumor	G2	M0	N0	Stage II	T2
TCGA-B2-A4SR-01	8.348	Tumor		M0		Stage II	T2
TCGA-A3-A6NN-01	8.335	Tumor	G2			Stage I	T1
TCGA-BP-4169-01	8.327	Tumor	G2	M0	N0	Stage II	T2
TCGA-BP-4337-01	8.324	Tumor	G4	M0	N0	Stage III	T3
TCGA-BP-4354-01	8.323	Tumor	G4	M1	N1	Stage IV	T4
TCGA-EU-5905-01	8.323	Tumor	G3	M0		Stage I	T1
TCGA-CZ-4863-01	8.319	Tumor	G3	M0	N0	Stage III	T3
TCGA-CJ-4905-01	8.315	Tumor	G2	M0		Stage I	T1
TCGA-B0-4845-01	8.308	Tumor	G2	M1		Stage IV	T3
TCGA-CJ-5671-01	8.304	Tumor	G3	M0		Stage I	T1
TCGA-A3-3372-01	8.303	Tumor	G2	M0		Stage III	T3
TCGA-CZ-4864-01	8.302	Tumor	G3	M0	N0	Stage II	T2
TCGA-B2-5635-01	8.284	Tumor	G2	M0		Stage I	T1
TCGA-B8-A54D-01	8.28	Tumor	G2			Stage III	T3
TCGA-B0-4688-01	8.279	Tumor	G4	M1	N0	Stage IV	T4
TCGA-CJ-4640-01	8.271	Tumor	G4	M0	N0	Stage III	T3
TCGA-CZ-5461-01	8.265	Tumor	G4	M1		Stage IV	T1
TCGA-BP-4995-01	8.263	Tumor	G3	M0	N0	Stage I	T1
TCGA-BP-5008-01	8.259	Tumor	G2	M0		Stage I	T1
TCGA-BP-4981-01	8.257	Tumor	G3	M0		Stage III	T3
TCGA-AK-3445-01	8.252	Tumor	G3	M0		Stage III	T3
TCGA-BP-4959-01	8.252	Tumor	G3	M0		Stage I	T1
TCGA-BP-5200-01	8.24	Tumor	G4	M0		Stage II	T2
TCGA-MM-A564-01	8.233	Tumor	G2			Stage II	T2
TCGA-CJ-4870-01	8.229	Tumor	G2	M0		Stage III	T3
TCGA-BP-4758-01	8.224	Tumor	G2	M0		Stage I	T1
TCGA-BP-4345-01	8.223	Tumor	G3	M0	N0	Stage III	T3
TCGA-A3-A8OU-01	8.223	Tumor	G1			Stage I	T1
TCGA-B0-5084-01	8.217	Tumor	G3	M1	N1	Stage IV	T3
TCGA-CZ-5458-01	8.205	Tumor	G3	M0		Stage III	T3
TCGA-B8-5164-01	8.204	Tumor	G3	M0	N0	Stage III	T3
TCGA-A3-3382-01	8.198	Tumor	G3	M0		Stage I	T1
TCGA-A3-3325-01	8.197	Tumor	G2	M0		Stage I	T1
TCGA-B0-5698-01	8.188	Tumor	G3	M0	N0	Stage I	T1
TCGA-AK-3431-01	8.184	Tumor	G3	M0		Stage II	T2
TCGA-CZ-5468-01	8.178	Tumor	G4	M1		Stage IV	T3
TCGA-G6-A8L6-01	8.167	Tumor	G3			Stage IV	T2
TCGA-B0-4714-01	8.164	Tumor	G3	M1		Stage IV	T3
TCGA-BP-5000-01	8.156	Tumor	G3	M0		Stage I	T1
TCGA-MM-A563-01	8.152	Tumor	G2				T3
TCGA-CZ-5469-01	8.15	Tumor	G2	M0	N0	Stage II	T2
TCGA-BP-4355-01	8.14	Tumor	G4	M0		Stage III	T3
TCGA-B0-5713-01	8.132	Tumor	G3	M0	N0	Stage III	T3
TCGA-B0-4699-01	8.125	Tumor	G4	M1	N0	Stage IV	T4
TCGA-CJ-4636-01	8.121	Tumor	G3	M0	N0	Stage III	T3
TCGA-CZ-4862-01	8.099	Tumor	G2	M0		Stage I	T1
TCGA-BP-5199-01	8.094	Tumor	G4	M0	N0	Stage II	T2
TCGA-B0-4841-01	8.086	Tumor	G3	M1		Stage IV	T2
TCGA-CZ-5466-01	8.082	Tumor	G2	M0		Stage III	T3
TCGA-BP-4341-01	8.078	Tumor	G2	M0		Stage III	T3
TCGA-CZ-5470-01	8.061	Tumor	G3	M0	N0	Stage II	T2
TCGA-BP-4163-01	8.052	Tumor	G3	M0	N0	Stage III	T3
TCGA-BP-4326-01	8.044	Tumor	G2	M0	N0	Stage I	T1
TCGA-BP-5010-01	8.04	Tumor	G4	M0	N0	Stage III	T3
TCGA-B8-5552-01	8.034	Tumor	G2	M0		Stage I	T1
TCGA-B2-5633-01	8.021	Tumor	G2	M0	N0	Stage I	T1
TCGA-CJ-4643-01	8	Tumor	G3	M0	N0	Stage II	T2
TCGA-BP-4349-01	7.994	Tumor	G2	M0		Stage I	T1
TCGA-BP-4799-01	7.984	Tumor	G3	M0	N0	Stage III	T3
TCGA-B0-4712-01	7.967	Tumor	G3	M1		Stage IV	T3
TCGA-B0-4945-01	7.945	Tumor	G2	M0	N0	Stage I	T1
TCGA-CJ-4888-01	7.929	Tumor	G4	M1		Stage IV	T3
TCGA-BP-5182-01	7.912	Tumor	G3	M0	N0	Stage I	T1
TCGA-B8-4148-01	7.91	Tumor	G3	M0	N0	Stage I	T1
TCGA-BP-4176-01	7.906	Tumor	G2	M0		Stage I	T1
TCGA-BP-4992-01	7.898	Tumor	G4	M0		Stage I	T1
TCGA-CJ-4873-01	7.892	Tumor	G3	M0	N0	Stage III	T3
TCGA-CW-6087-01	7.886	Tumor	G4	M1	N1	Stage IV	T3
TCGA-BP-4344-01	7.879	Tumor	G2	M0		Stage I	T1
TCGA-BP-4771-01	7.876	Tumor	G4	M1	N0	Stage IV	T3
TCGA-CZ-5467-01	7.86	Tumor	G4	M0	N0	Stage III	T3
TCGA-B0-4815-01	7.849	Tumor	G4	M0		Stage III	T3
TCGA-B0-4696-01	7.846	Tumor	G3	M0	N0	Stage III	T3
TCGA-B0-5081-01	7.833	Tumor	G2	M0	N0	Stage III	T3
TCGA-BP-4986-01	7.824	Tumor	G3	M0	N0	Stage I	T1
TCGA-CJ-4894-01	7.79	Tumor	G3	M0	N0	Stage III	T3
TCGA-B8-5162-01	7.775	Tumor	G2	M0		Stage II	T2
TCGA-B0-4839-01	7.765	Tumor	G2	M0	N0	Stage I	T1
TCGA-B0-5106-01	7.76	Tumor	G2	M0	N0	Stage I	T1
TCGA-AK-3434-01	7.747	Tumor	G2	M0		Stage I	T1
TCGA-B0-4813-01	7.744	Tumor	G3	M0		Stage III	T3
TCGA-B0-4842-01	7.737	Tumor	G4	M0	N0	Stage III	T3
TCGA-MM-A84U-01	7.73	Tumor	G2			Stage I	T1
TCGA-B0-4849-01	7.723	Tumor	G3	M0		Stage III	T3
TCGA-BP-4173-01	7.72	Tumor	G3	M0	N0	Stage II	T2
TCGA-B0-4816-01	7.68	Tumor	G3	M0	N0	Stage II	T2
TCGA-CJ-4881-01	7.675	Tumor	G3	M0		Stage III	T3
TCGA-BP-4993-01	7.659	Tumor	G3	M0		Stage I	T1
TCGA-B0-4707-01	7.655	Tumor	G4	M0		Stage III	T3
TCGA-B0-5108-01	7.654	Tumor	G2	M0	N0	Stage III	T3
TCGA-DV-5573-01	7.65	Tumor	G2	M0		Stage I	T1
TCGA-CJ-6033-01	7.65	Tumor	G4	M1	N0	Stage IV	T3
TCGA-BP-4989-01	7.626	Tumor	G3	M0	N0	Stage III	T3
TCGA-CJ-4923-01	7.622	Tumor	G4	M1		Stage IV	T3
TCGA-B0-4697-01	7.618	Tumor	G4	M1		Stage IV	T3
TCGA-CJ-4885-01	7.599	Tumor	G3	M1		Stage IV	T3
TCGA-BP-4761-01	7.597	Tumor	G4	M0	N1	Stage III	T3
TCGA-CJ-5680-01	7.594	Tumor	G4	M1		Stage IV	T3
TCGA-BP-4787-01	7.594	Tumor	G4	M1	N0	Stage IV	T3
TCGA-DV-A4W0-01	7.588	Tumor	G3			Stage I	T1
TCGA-A3-3376-01	7.547	Tumor	G2	M0	N0	Stage I	T1
TCGA-CJ-5689-01	7.542	Tumor	G4	M0		Stage I	T1
TCGA-B0-5098-01	7.54	Tumor	G3	M0		Stage I	T1
TCGA-BP-4994-01	7.509	Tumor	G3	M0		Stage I	T1
TCGA-BP-4998-01	7.503	Tumor	G3	M0		Stage I	T1
TCGA-B0-5109-01	7.49	Tumor	G4	M0	N1	Stage III	T3
TCGA-CJ-5681-11	7.482	Normal	G3	M1		Stage IV	T3
TCGA-B0-5702-01	7.471	Tumor	G2	M0	N0	Stage I	T1
TCGA-B0-5712-01	7.461	Tumor	G3	M1	N0	Stage IV	T2
TCGA-B8-5553-01	7.425	Tumor	G2	M0	N0	Stage I	T1
TCGA-B0-5710-01	7.414	Tumor	G2	M0	N0	Stage I	T1
TCGA-B8-5551-01	7.403	Tumor	G3	M0	N0	Stage I	T1
TCGA-CZ-4865-01	7.388	Tumor	G2	M0		Stage I	T1
TCGA-B0-5096-01	7.369	Tumor		M0	N1	Stage III	T3
TCGA-B0-4838-01	7.353	Tumor	G3	M0	N0	Stage I	T1
TCGA-AK-3425-01	7.352	Tumor	G2	M0	N0	Stage I	T1
TCGA-CJ-4900-01	7.306	Tumor	G4	M1	N1	Stage IV	T4
TCGA-CJ-4876-01	7.291	Tumor	G3	M0	N0	Stage II	T2
TCGA-CJ-4884-01	7.212	Tumor	G3	M0		Stage III	T3
TCGA-G6-A8L8-01	7.198	Tumor	G3			Stage I	T1
TCGA-BP-4782-01	7.18	Tumor	G2	M0		Stage I	T1
TCGA-AK-3426-01	7.107	Tumor	G3	M0	N1	Stage III	T3
TCGA-B8-5552-11	7.085	Normal	G2	M0		Stage I	T1
TCGA-BP-4971-01	7.08	Tumor	G3	M0	N0	Stage III	T3
TCGA-CJ-5672-01	7.075	Tumor	G3	M0		Stage I	T1
TCGA-CJ-4890-01	7.064	Tumor	G4	M1	N0	Stage IV	T3
TCGA-BP-4770-01	7.062	Tumor	G4	M0	N0	Stage IV	T4
TCGA-BP-4985-01	7.017	Tumor	G4	M0	N0	Stage III	T3
TCGA-CJ-4889-01	7.007	Tumor	G4	M0		Stage I	T1
TCGA-B0-4703-01	7.004	Tumor	G4	M1	N0	Stage IV	T3
TCGA-CJ-4891-01	6.986	Tumor	G4	M0	N0	Stage III	T3
TCGA-CJ-6030-01	6.955	Tumor	G3	M0	N0	Stage I	T1
TCGA-B8-5546-01	6.953	Tumor	G2	M0	N0	Stage I	T1
TCGA-DV-5565-01	6.947	Tumor	G2	M0		Stage I	T1
TCGA-CJ-4878-01	6.859	Tumor	G2	M0		Stage III	T3
TCGA-CJ-5681-01	6.857	Tumor	G3	M1		Stage IV	T3
TCGA-CZ-5462-01	6.852	Tumor	G3	M1		Stage IV	T1
TCGA-DV-5574-01	6.819	Tumor	G2	M0		Stage I	T1
TCGA-B0-5697-01	6.809	Tumor	G2	M0	N0	Stage I	T1
TCGA-B0-5080-01	6.796	Tumor	G3	M1	N0	Stage IV	T3
TCGA-B8-A54I-01	6.714	Tumor	G3			Stage I	T1
TCGA-BP-4970-01	6.669	Tumor	G3	M0	N1	Stage III	T1
TCGA-B4-5835-01	6.57	Tumor	G2	M0	N0	Stage I	T1
TCGA-CJ-5680-11	6.531	Normal	G4	M1		Stage IV	T3
TCGA-BP-4798-01	6.251	Tumor	G4	M1	N0		T3
TCGA-B8-5545-01	6.17	Tumor	G2	M0	N0	Stage I	T1
TCGA-B0-5102-01	6.134	Tumor	G3	M0		Stage I	T1
TCGA-B0-5107-01	6.021	Tumor	G4	M1	N0	Stage IV	T2
TCGA-B0-4819-01	5.902	Tumor	G4	M1		Stage IV	T3
TCGA-CJ-4912-01	5.888	Tumor	G3	M0		Stage II	T2
TCGA-CJ-4918-01	5.765	Tumor	G4	M1	N0	Stage IV	T3
TCGA-A3-3313-01	5.707	Tumor	G3	M0	N0	Stage I	T1
TCGA-B8-A8YJ-01	5.677	Tumor	G2			Stage I	T1
TCGA-BP-5196-01	5.514	Tumor	G2	M0		Stage I	T1
TCGA-AS-3777-01	5.476	Tumor		M0		Stage I	T1
TCGA-B8-A54E-01	5.255	Tumor	G3			Stage I	T1
TCGA-A3-3328-01	5.197	Tumor	G2	M0	N0	Stage I	T1
TCGA-BP-4756-01	5.174	Tumor	G2	M0	N0	Stage I	T1
TCGA-AK-3465-01	5.132	Tumor		M0		Stage I	T1
TCGA-B0-5100-01	5.068	Tumor	G3	M0		Stage III	T3
TCGA-BP-4352-01	4.949	Tumor	G4	M1	N0	Stage IV	T3
TCGA-B0-4834-01	4.681	Tumor	G3	M0	N0	Stage I	T1
TCGA-CJ-4642-01	4.517	Tumor	G2	M0		Stage II	T2
TCGA-CW-5584-11	4.501	Normal	G3	M0	N1	Stage III	T3
TCGA-B0-5083-01	4.345	Tumor	G3	M0	N0	Stage I	T1
TCGA-A3-3363-01	4.312	Tumor	G2	M0	N0	Stage II	T2
TCGA-B8-4622-11	4.235	Normal	G3	M1	N0	Stage IV	T3
TCGA-BP-4795-01	4.209	Tumor	G2	M0	N0	Stage I	T1
TCGA-B0-5694-11	4.179	Normal	G3	M0	N0	Stage III	T3
TCGA-B2-3923-01	4.166	Tumor	G2	M0		Stage II	T2
TCGA-B8-4619-01	4.088	Tumor	G2	M0	N0	Stage I	T1
TCGA-AK-3440-01	3.974	Tumor	G3	M0		Stage I	T1
TCGA-CW-5591-01	3.97	Tumor	G2	M1	N0	Stage IV	T3
TCGA-B2-5636-01	3.957	Tumor	G2	M0		Stage I	T1
TCGA-BP-4784-01	3.938	Tumor	G2	M0		Stage I	T1
TCGA-B0-5117-01	3.915	Tumor	G2	M0		Stage I	T1
TCGA-AK-3456-01	3.843	Tumor	G3	M0	N0	Stage II	T2
TCGA-BP-4760-01	3.781	Tumor	G2	M0		Stage I	T1
TCGA-B8-4619-11	3.662	Normal	G2	M0	N0	Stage I	T1
TCGA-B0-5711-11	3.658	Normal	G3	M0		Stage III	T3
TCGA-CZ-4864-11	3.647	Normal	G3	M0	N0	Stage II	T2
TCGA-B0-5691-11	3.605	Normal	G3	M0	N0	Stage I	T1
TCGA-DV-A4W0-05	3.605	Tumor	G3			Stage I	T1
TCGA-BP-4334-01	3.601	Tumor	G3	M0	N0	Stage III	T3
TCGA-AK-3427-01	3.58	Tumor		M0	N0	Stage I	T1
TCGA-CZ-5461-11	3.531	Normal	G4	M1		Stage IV	T1
TCGA-B2-4098-01	3.499	Tumor	G2	M0		Stage I	T1
TCGA-AK-3433-01	3.485	Tumor		M0	N0	Stage II	T2
TCGA-CW-6087-11	3.457	Normal	G4	M1	N1	Stage IV	T3
TCGA-AK-3443-01	3.443	Tumor		M0	N0	Stage II	T2
TCGA-CJ-5679-11	3.382	Normal	G4	M0		Stage III	T3
TCGA-CZ-5987-11	3.354	Normal	G2	M1		Stage IV	T3
TCGA-B8-4621-01	3.348	Tumor	G3	M0	N0	Stage I	T1
TCGA-CZ-5985-11	3.323	Normal	G2	M0	N0	Stage II	T2
TCGA-CZ-5466-11	3.316	Normal	G2	M0		Stage III	T3
TCGA-DV-5576-01	3.306	Tumor	G2	M0		Stage I	T1
TCGA-A3-3374-01	3.237	Tumor	G2	M0	N0	Stage I	T1
TCGA-CJ-5677-11	3.228	Normal	G4	M1		Stage IV	T3
TCGA-B4-5378-01	3.22	Tumor	G2	M0	N0	Stage I	T1
TCGA-CW-5587-11	3.188	Normal	G2	M0	N0	Stage III	T3
TCGA-B0-5701-11	3.159	Normal	G4	M0	N0	Stage III	T3
TCGA-CW-5589-11	3.141	Normal	G2	M0		Stage I	T1
TCGA-CJ-5676-11	3.117	Normal	G3	M0		Stage III	T3
TCGA-BP-4177-01	3.091	Tumor	G2	M0		Stage I	T1
TCGA-B2-5636-11	3.061	Normal	G2	M0		Stage I	T1
TCGA-CJ-6030-11	3.045	Normal	G3	M0	N0	Stage I	T1
TCGA-B0-5709-11	3.03	Normal	G3	M0		Stage III	T3
TCGA-DV-5567-01	3.008	Tumor	G2	M0		Stage I	T1
TCGA-CZ-4863-11	2.982	Normal	G3	M0	N0	Stage III	T3
TCGA-B0-5703-11	2.974	Normal	G3	M0	N0	Stage I	T1
TCGA-B0-5707-01	2.949	Tumor	G3	M0	N0	Stage I	T1
TCGA-CZ-5986-11	2.942	Normal	G3	M0	N0	Stage I	T1
TCGA-B0-4700-11	2.895	Normal	G4	M1		Stage IV	T4
TCGA-CJ-6033-11	2.891	Normal	G4	M1	N0	Stage IV	T3
TCGA-CZ-5456-11	2.808	Normal	G3	M0	N0	Stage II	T2
TCGA-6D-AA2E-01	2.794	Tumor	G2			Stage I	T1
TCGA-CZ-5463-11	2.793	Normal	G2	M0		Stage II	T2
TCGA-B0-5402-11	2.766	Normal	G4	M0		Stage IV	T4
TCGA-CW-5585-11	2.763	Normal	G2	M1	N0	Stage IV	T3
TCGA-CZ-5468-11	2.76	Normal	G4	M1		Stage IV	T3
TCGA-B0-4712-11	2.759	Normal	G3	M1		Stage IV	T3
TCGA-CZ-5989-11	2.736	Normal	G2	M0	N0	Stage II	T2
TCGA-B0-5690-11	2.704	Normal	G1	M0		Stage I	T1
TCGA-B0-5706-11	2.689	Normal	G2	M0	N0	Stage II	T2
TCGA-CZ-5454-11	2.682	Normal	G2	M1	N0	Stage IV	T2
TCGA-B0-5696-11	2.657	Normal	G4	M0	N0	Stage III	T3
TCGA-B0-5705-11	2.656	Normal	G2	M0	N0	Stage I	T1
TCGA-A3-3387-11	2.649	Normal	G2	M0	N0	Stage I	T1
TCGA-CZ-5469-11	2.608	Normal	G2	M0	N0	Stage II	T2
TCGA-B8-5549-11	2.6	Normal	G3	M0	N0	Stage I	T1
TCGA-CW-6090-11	2.593	Normal	G3	M0		Stage I	T1
TCGA-CZ-5455-11	2.581	Normal	G4	M1		Stage IV	T3
TCGA-CZ-5452-11	2.568	Normal	G2	M0	N0	Stage II	T2
TCGA-B8-A54K-01	2.567	Tumor	G1			Stage I	T1
TCGA-CW-5580-11	2.533	Normal	G3	M1		Stage IV	T3
TCGA-CZ-5451-11	2.528	Normal	G3	M0	N0	Stage II	T2
TCGA-T7-A92I-01	2.456	Tumor	G1			Stage I	T1
TCGA-CZ-5465-11	2.45	Normal	G2	M0		Stage III	T3
TCGA-CZ-5462-11	2.441	Normal	G3	M1		Stage IV	T1
TCGA-CZ-5453-11	2.43	Normal	G2	M0		Stage II	T2
TCGA-B0-5699-11	2.384	Normal	G2	M0	N0	Stage I	T1
TCGA-BP-4769-01	2.381	Tumor	G2	M0		Stage I	T1
TCGA-A3-3358-11	2.379	Normal	G2	M0	N0	Stage I	T1
TCGA-DV-A4VZ-01	2.364	Tumor	G2			Stage I	T1
TCGA-CZ-5984-11	2.294	Normal	G3	M0	N0	Stage I	T1
TCGA-CJ-5678-11	2.291	Normal	G3	M1	N0	Stage IV	T2
TCGA-AK-3447-01	2.279	Tumor	G2	M0		Stage II	T2
TCGA-CW-6088-11	2.247	Normal	G2	M0	N0	Stage I	T1
TCGA-CJ-5672-11	2.238	Normal	G3	M0		Stage I	T1
TCGA-B8-4620-11	2.214	Normal	G2	M0	N0	Stage III	T3
TCGA-CZ-5988-11	2.211	Normal	G2	M0	N0	Stage I	T1
TCGA-CZ-5470-11	2.159	Normal	G3	M0	N0	Stage II	T2
TCGA-B0-5712-11	2.148	Normal	G3	M1	N0	Stage IV	T2
TCGA-CZ-5458-11	2.113	Normal	G3	M0		Stage III	T3
TCGA-CW-5581-11	2.084	Normal	G3	M0		Stage I	T1
TCGA-B0-5697-11	1.82	Normal	G2	M0	N0	Stage I	T1
TCGA-CJ-5689-11	1.721	Normal	G4	M0		Stage I	T1
TCGA-CZ-4865-11	1.71	Normal	G2	M0		Stage I	T1
TCGA-CZ-5467-11	1.466	Normal	G4	M0	N0	Stage III	T3
TCGA-B2-5641-11	1.433	Normal	G3	M0	N0	Stage I	T1
TCGA-CZ-5982-11	1.416	Normal	G2	M0		Stage I	T1
TCGA-CZ-5457-11	1.368	Normal	G4	M0		Stage III	T3
TCGA-AK-3453-01	1.225	Tumor	G2	M0		Stage II	T2
